# Supplementary material
Source: Research Square preprint supplement (doi:10.21203/rs.3.rs-9395841/v1)
Supplement: Supplementary file 1 [file fe09e21594deb990871a8ce3.pdf]

## Supplementary Information

### Questionnaire data collection tool (English and Arabic versions)

#### English version

#### Questionnaire

#### Part 1: The following questions are about sociodemographic and work-related:

1. Age: ..... years
2. Place of residency: North Gaza, Gaza,  Midzone  , Khan Younis  , Rafah.
3. Academic qualification: Diploma 2 years  , Diploma 3 years  , Bachelor's degree  , Master's degree  , PhD
4. Years of experience: .....
5. Name of clinic: .....
6. Have you ever received any lectures or courses on drug effects on breastfeeding?  
 Yes  No

If yes, please specify according to the table below

| Course | Organization |
|--------|--------------|
|        |              |
|        |              |
|        |              |

#### Part 2: The following items relate to knowledge about drugs affecting breastfeeding

| No. | Items                                                                                                     | Yes | No |
|-----|-----------------------------------------------------------------------------------------------------------|-----|----|
| 1.  | Taking a drug during breastfeeding is safe.                                                               |     |    |
| 2.  | Some drugs affect the amount of milk for the baby.                                                        |     |    |
| 3.  | Almost all drugs transfer into breast milk, and this may carry a risk to breastfeeding.                   |     |    |
| 4.  | Some drugs should be stopped during breastfeeding.                                                        |     |    |
| 5.  | Antiemetic drugs such as metoclopramide (Pramin) increase the amount of milk the baby receives.           |     |    |
| 6.  | The benefits of breastfeeding continue if mothers avoid using drugs.                                      |     |    |
| 7.  | Prolactin is affected by the use of some drugs during breastfeeding.                                      |     |    |
| 8.  | Drugs can affect milk secretion or composition by affecting mammary gland development and milk secretion. |     |    |

|     |                                                                                  |  |  |
|-----|----------------------------------------------------------------------------------|--|--|
| 9.  | Antihistamines are considered to be safe.                                        |  |  |
| 10. | Anticonvulsants are considered unsafe during breastfeeding.                      |  |  |
| 11. | Anticoagulants such as heparin are considered and do not cross into breast milk. |  |  |
| 12. | Antibiotics, such as tetracyclines, affect bone growth.                          |  |  |
| 13. | Avoid taking aspirin during breastfeeding due to the risk of Reye's syndrome.    |  |  |
| 14. | Have access to resources about drug safety on breastfeeding.                     |  |  |
| 15. | Analgesics such as paracetamol (Acamol) affect breastfeeding.                    |  |  |
| 16. | ibuprofen (Trufen) effect on the taste of milk for the baby                      |  |  |
| 17. | Some mothers need to use drugs during breastfeeding.                             |  |  |
| 18. | Transfer some drugs from maternal plasma to milk                                 |  |  |
| 19. | Have good information about drugs affecting breastfeeding.                       |  |  |

**Part 3: The following items relate to attitudes towards drugs affecting breastfeeding.**

| No. | Items                                                                                                                           | Agree | Not sure | Disagree |
|-----|---------------------------------------------------------------------------------------------------------------------------------|-------|----------|----------|
| 1.  | Workload pressure prohibits me from giving information about drugs affecting breastfeeding.                                     |       |          |          |
| 2.  | The effect of drugs on breastfeeding is a problem for the baby.                                                                 |       |          |          |
| 3.  | Health Education is the best way to decrease the harmful effects of drugs on breastfeeding.                                     |       |          |          |
| 4.  | Nursing counselling is the best way to decrease the harmful effects of drugs on breastfeeding.                                  |       |          |          |
| 5.  | Women should be encouraged to avoid over-the-counter drugs during breastfeeding.                                                |       |          |          |
| 6.  | Drugs affecting breastfeeding should be included in the clinic's guide.                                                         |       |          |          |
| 7.  | Service provided by health education and nursing counselling is adequate for women about the effects of drugs on breastfeeding. |       |          |          |
| 8.  | There is a relationship between the income of the family and drug use during breastfeeding.                                     |       |          |          |

|     |                                                                                                                |  |  |  |
|-----|----------------------------------------------------------------------------------------------------------------|--|--|--|
| 9.  | There is a relationship between a mother's educational level and drugs.                                        |  |  |  |
| 10. | There is a relationship between the number of births and attitudes about the effect of breastfeeding on drugs. |  |  |  |
| 11. | Would you like to conduct training courses on drugs affecting breastfeeding                                    |  |  |  |

Note: The questionnaire is presented as administered. Minor linguistic irregularities in the English version reflect the original study instrument and its close translation from the Arabic interviewer-administered version.

### Arabic version

#### الاستبانة

#### الجزء الاول : المعلومات الشخصية:

1. العمر:
2. مكان السكن:  شمال غزة  غزة  الوسطى  خان يونس  رفح.
3. المؤهل العلمي:  دبلوم سنتين  دبلوم 3 سنوات  بكالوريوس  ماجستير  دكتوراه .
4. سنوات الخبرة: .....
5. اسم العيادة: .....
6. هل سبق لك أن تلقيت أي محاضرة أو دورة عن الأدوية التي تؤثر على الرضاعة الطبيعية؟

لا  نعم

إذا كانت الإجابة بنعم، يرجى تحديدها وفقًا للجدول أدناه:

| الدورة | المؤسسة |
|--------|---------|
|        |         |
|        |         |
|        |         |

الجزء الثاني: العناصر التالية حول ( معرفة الممرضات حول الأدوية التي تؤثر على الرضاعة الطبيعية):

| الرقم | العنصر                                                                                               | نعم | لا |
|-------|------------------------------------------------------------------------------------------------------|-----|----|
| 1     | العديد من الأدوية آمنة أثناء الرضاعة الطبيعية                                                        |     |    |
| 2     | تؤثر بعض الأدوية على كمية الحليب للرضيع.                                                             |     |    |
| 3     | جميع الأدوية تنتقل إلى حليب الثدي وهذا قد يحمل خطرا على الرضيع.                                      |     |    |
| 4     | يجب إيقاف بعض الأدوية أثناء الرضاعة الطبيعية.                                                        |     |    |
| 5     | تزيد الأدوية المضادة للتقيؤ مثل البرامين من كمية الحليب للرضيع.                                      |     |    |
| 6     | تزيد فوائد الرضاعة الطبيعية إذا تجنبت الأم استخدام الادوية.                                          |     |    |
| 7     | هرمون الحليب يتأثر ببعض الأدوية المستخدمة أثناء الرضاعة.                                             |     |    |
| 8     | يمكن أن تؤثر الأدوية على إفراز الحليب أو تركيبه من خلال التأثير على نمو الغدة الثديية وإفراز الحليب. |     |    |
| 9     | الأدوية المضادة للحساسية آمنة أثناء الرضاعة.                                                         |     |    |
| 10    | ادوية التشنج غير آمنة أثناء الرضاعة الطبيعية.                                                        |     |    |
| 11    | الأدوية مانعة التجلط مثل: الهيبارين آمنة ولا تؤثر على حليب الثدي.                                    |     |    |
| 12    | يؤثر المضاد الحيوي التتراسيكلين على نمو العظام عند الرضيع.                                           |     |    |
| 13    | تجنب تناول الأسبرين أثناء الرضاعة لأنه يسبب Rye's syndrome للرضيع.                                   |     |    |
| 14    | صعب الوصول إلى المراجع حول الادوية المؤثرة على الرضاعة الطبيعية.                                     |     |    |
| 15    | المسكنات مثل الاكامول آمنة أثناء الرضاعة .                                                           |     |    |
| 16    | يؤثر التروفين على طعم الحليب للرضيع .                                                                |     |    |
| 17    | تحتاج بعض الأمهات إلى استخدام الأدوية أثناء الرضاعة الطبيعية.                                        |     |    |
| 18    | يتم نقل بعض الأدوية من بلازما الأم إلى الحليب .                                                      |     |    |
| 19    | لدي معلومات جيدة عن الأدوية التي تؤثر على الرضاعة الطبيعية.                                          |     |    |

**الجزء الثالث: العناصر التالية حول (اتجاهات الممرضات حول الأدوية التي تؤثر على الرضاعة الطبيعية)**

|     |                                                                                                              |
|-----|--------------------------------------------------------------------------------------------------------------|
| 1.  | ضغط العمل يؤثر من إعطاء معلومات (للأم) عن الأدوية التي تؤثر على الرضاعة الطبيعية.                            |
| 2.  | تأثير الأدوية على الرضاعة الطبيعية يمثل مشكلة بالنسبة لحليب الأم.                                            |
| 3.  | التثقيف الصحي هو أفضل وسيلة لتقليل استخدام الأدوية التي تؤثر على حليب الأم                                   |
| 4.  | الاستشارة التمرضية هي أفضل وسيلة لتقليل استخدام الادوية أثناء الرضاعة الطبيعية.                              |
| 5.  | تشجيع النساء على تجنب استخدام الأدوية التي تؤثر على الرضاعة الطبيعية                                         |
| 6.  | ارغب في تضمين الأدوية التي تؤثر على الرضاعة الطبيعية في دليل العيادات.                                       |
| 7.  | الخدمة المقدمة من التثقيف الصحي والاستشارة التمرضية كافية للنساء حول الأدوية التي تؤثر على الرضاعة الطبيعية. |
| 8.  | هناك علاقة بين دخل الأسرة وكثرة استخدام الدواء أثناء الرضاعة الطبيعية.                                       |
| 9.  | تعتقد هناك علاقة للمستوي التعليمي للأم حول الأدوية المؤثرة على الرضاعة الطبيعية.                             |
| 10. | هناك علاقة بين عدد الولادات للأم واتجاهاتها حول الأدوية المؤثرة على الرضاعة الطبيعية.                        |
| 11. | ارغب في إجراء دورات تدريبية أثناء العمل حول الأدوية التي تؤثر على الرضاعة الطبيعية.                          |

**Table S1** Distribution of the total PHCC nursing workforce and achieved sample by governorate

| Residency    | Total PHCC nursing workforce by region* | Sample     |
|--------------|-----------------------------------------|------------|
| North        | 78                                      | 22         |
| Gaza         | 113                                     | 42         |
| Midzone      | 109                                     | 18         |
| Khan Younis  | 50                                      | 36         |
| Rafah        | 44                                      | 32         |
| <b>Total</b> | <b>394</b>                              | <b>150</b> |

\*Population column refers to the total governmental PHCC nursing workforce by governorate, whereas the eligible study population comprised 194 female nurses

**Table S2** Knowledge of study participants (n=150) regarding drug safety in breastfeeding

| No | Item                                                                                            | Yes |      | No  |      | Rank |
|----|-------------------------------------------------------------------------------------------------|-----|------|-----|------|------|
|    |                                                                                                 | N   | %    | N   | %    |      |
| 1. | Taking drugs during breastfeeding is safe.                                                      | 67  | 44.7 | 83  | 55.3 | 7    |
| 2. | Some drugs affect the amount of milk for the baby.                                              | 32  | 21.3 | 118 | 78.7 | 13   |
| 3. | Almost all drugs transfer into breast milk, and this may carry a risk to breastfeeding.         | 95  | 63.3 | 55  | 36.7 | 4    |
| 4. | Some drugs should be stopped during breastfeeding.                                              | 22  | 14.7 | 128 | 85.3 | 17   |
| 5. | Antiemetic drugs such as metoclopramide (Pramin) increase the amount of milk the baby receives. | 103 | 68.7 | 47  | 31.3 | 2    |
| 6. | The benefits of breastfeeding continue if mothers avoid using drugs.                            | 24  | 16.0 | 126 | 84.0 | 16   |
| 7. | Prolactin is affected by the use of some drugs during breastfeeding.                            | 18  | 12.0 | 132 | 88.0 | 19   |

|     |                                                                                                           |     |       |     |      |    |
|-----|-----------------------------------------------------------------------------------------------------------|-----|-------|-----|------|----|
| 8.  | Drugs can affect milk secretion or composition by affecting mammary gland development and milk secretion. | 150 | 100.0 | 0   | 0    | 1  |
| 9.  | Antihistamines are considered to be safe.                                                                 | 46  | 30.7  | 104 | 69.3 | 10 |
| 10. | Anticonvulsants are considered unsafe during breastfeeding.                                               | 46  | 30.7  | 104 | 69.3 | 10 |
| 11. | Anticoagulants such as heparin are considered and do not cross into breast milk.                          | 28  | 18.7  | 122 | 81.3 | 15 |
| 12. | Antibiotics: Tetracyclines effect on bone growth.                                                         | 57  | 38.0  | 93  | 62.0 | 9  |
| 13. | Avoid taking aspirin during breastfeeding due to the risk of Reye's syndrome.                             | 89  | 59.3  | 61  | 40.7 | 6  |
| 14. | You have access to resources about drug safety in breastfeeding.                                          | 20  | 13.3  | 130 | 86.7 | 18 |
| 15. | Analgesics such as paracetamol affect breastfeeding.                                                      | 99  | 66.0  | 51  | 34.0 | 3  |
| 16. | ibuprofen (Trufen) effect on the taste of milk for the baby                                               | 36  | 24.0  | 114 | 76.0 | 12 |
| 17. | Some mothers need to use drugs during breastfeeding.                                                      | 31  | 20.7  | 119 | 79.3 | 14 |
| 18. | Transfer some drugs from maternal plasma to milk                                                          | 95  | 63.3  | 55  | 36.7 | 4  |
| 19. | have good information about drugs affecting breastfeeding.                                                | 67  | 44.7  | 83  | 55.3 | 7  |

**Table S3** Attitudes of study participants (n=150) regarding drugs in breastfeeding

| No. | Item                                                                                                                            | Disagree |      | Not sure |      | Agree |      | Rank |
|-----|---------------------------------------------------------------------------------------------------------------------------------|----------|------|----------|------|-------|------|------|
|     |                                                                                                                                 | N        | %    | N        | %    | N     | %    |      |
| 1.  | Workload pressure prohibits me from giving information about drugs affecting breastfeeding.                                     | 33       | 22.0 | 19       | 12.7 | 98    | 65.3 | 9    |
| 2.  | The effect of drugs on breastfeeding is a problem for the baby.                                                                 | 10       | 6.7  | 26       | 17.3 | 114   | 76.0 | 7    |
| 3.  | Health Education is the best way to decrease the harmful effects of drugs on breastfeeding.                                     | 0        | 0    | 2        | 1.3  | 148   | 98.7 | 1    |
| 4.  | Nursing counselling is the best way to decrease the harmful effects of drugs on breastfeeding.                                  | 9        | 6.0  | 19       | 12.7 | 122   | 81.3 | 6    |
| 5.  | Women should be encouraged to avoid over-the-counter drugs during breastfeeding.                                                | 1        | 0.7  | 4        | 2.7  | 145   | 96.7 | 2    |
| 6.  | Drugs affecting breastfeeding should be included in the clinic's guide*.                                                        | 1        | 0.7  | 5        | 3.3  | 144   | 96.0 | 3    |
| 7.  | Service provided by health education and nursing counselling is adequate for women about the effects of drugs on breastfeeding. | 56       | 37.3 | 47       | 31.3 | 47    | 31.3 | 11   |
| 8.  | There is a relationship between the income of the family and drug use during breastfeeding.                                     | 94       | 62.7 | 0        | 0    | 56    | 37.3 | 10   |

|     |                                                                                                                |    |      |   |     |     |      |   |
|-----|----------------------------------------------------------------------------------------------------------------|----|------|---|-----|-----|------|---|
| 9.  | There is a relationship between a mother's educational level and drugs.                                        | 26 | 17.3 | 0 | 0   | 124 | 82.7 | 5 |
| 10. | There is a relationship between the number of births and attitudes about the effect of breastfeeding on drugs. | 47 | 31.3 | 0 | 0   | 103 | 68.7 | 8 |
| 11. | Would you like to conduct training courses on drugs affecting breastfeeding                                    | 3  | 2.0  | 5 | 3.3 | 142 | 94.7 | 4 |

\*Note. "clinic's guide" refers to the written clinic guide or manual used by staff in primary healthcare clinics.

**Table S4:** Differences in knowledge about drugs affecting breastfeeding and selected variables (n= 150)

| Variable                               | N   | Mean score | SD   | Test statistic | P value |
|----------------------------------------|-----|------------|------|----------------|---------|
| <b>Age</b>                             |     |            |      |                |         |
| 30 years and below                     | 10  | 38.4       | 8.2  | 0.411          | 0.664   |
| 31 - 40 years                          | 75  | 34.3       | 13.0 |                |         |
| 41 years and above                     | 65  | 34.9       | 13.9 |                |         |
| <b>Place of residency</b>              |     |            |      |                |         |
| North Gaza                             | 26  | 33.2       | 12.4 | 1.791          | 0.134   |
| Gaza                                   | 31  | 40.0       | 12.4 |                |         |
| Midzone                                | 25  | 35.1       | 14.4 |                |         |
| Khan Younis                            | 33  | 34.1       | 12.4 |                |         |
| Rafah                                  | 35  | 32.0       | 13.4 |                |         |
| <b>Qualification</b>                   |     |            |      |                |         |
| Diploma 2 years                        | 48  | 35.3       | 13.6 | 0.131          | 0.942   |
| Diploma 3 years                        | 30  | 33.8       | 14.8 |                |         |
| BSN                                    | 60  | 34.7       | 12.2 |                |         |
| Master                                 | 12  | 36.4       | 12.3 |                |         |
| <b>Years of experience</b>             |     |            |      |                |         |
| 10 years or less                       | 28  | 35.9       | 10.5 | 0.106          | 0.899   |
| 11 – 20 years                          | 84  | 34.5       | 13.7 |                |         |
| 21 years and more                      | 38  | 34.7       | 13.7 |                |         |
| <b>Address of the clinic</b>           |     |            |      |                |         |
| North Gaza                             | 22  | 33.7       | 12.5 | 2.210          | 0.071   |
| Gaza                                   | 42  | 38.9       | 14.1 |                |         |
| Midzone                                | 18  | 32.7       | 11.1 |                |         |
| Khan Younis                            | 36  | 35.8       | 12.8 |                |         |
| Rafah                                  | 32  | 30.4       | 12.5 |                |         |
| <b>Had a training course (t- test)</b> |     |            |      |                |         |
| No                                     | 130 | 34.9       | 13.5 | 0.050          | 0.960   |
| Yes                                    | 20  | 34.7       | 11.2 |                |         |

**Table S5:** Differences in attitudes about drugs affecting breastfeeding and selected variables (n= 150)

| Variable                              | N   | Mean score | SD   | Test statistic | P value |
|---------------------------------------|-----|------------|------|----------------|---------|
| <b>Years of experience</b>            |     |            |      |                |         |
| 10 years or less                      | 28  | 80.5       | 10.4 | 2.343          | 0.100   |
| 11 – 20 years                         | 84  | 74.1       | 13.7 |                |         |
| 21 years and more                     | 38  | 74.1       | 16.8 |                |         |
| <b>Address of the clinic</b>          |     |            |      |                |         |
| North Gaza                            | 22  | 66.9       | 12.0 | 4.434          | 0.002*  |
| Gaza                                  | 42  | 75.7       | 14.8 |                |         |
| Midzone                               | 18  | 69.6       | 18.9 |                |         |
| Khan Younis                           | 36  | 80.3       | 10.0 |                |         |
| Rafah                                 | 32  | 78.1       | 14.1 |                |         |
| <b>Had a training course (t-test)</b> |     |            |      |                |         |
| No                                    | 130 | 74.6       | 14.7 | 2.524          | 0.114   |
| Yes                                   | 20  | 80.0       | 8.1  |                |         |

| Variable                  | N  | Mean score | SD   | Test statistic | P value |
|---------------------------|----|------------|------|----------------|---------|
| <b>Age</b>                |    |            |      |                |         |
| 30 years and below        | 10 | 80.9       | 10.0 | 0.872          | 0.420   |
| 31 - 40 years             | 75 | 75.2       | 13.3 |                |         |
| 41 years and above        | 65 | 74.5       | 15.5 |                |         |
| <b>Place of residency</b> |    |            |      |                |         |
| North Gaza                | 26 | 69.5       | 12.5 | 4.270          | 0.003*  |
| Gaza                      | 31 | 75.9       | 15.6 |                |         |
| Midzone                   | 25 | 69.4       | 17.3 |                |         |
| Khan Younis               | 33 | 81.5       | 9.7  |                |         |
| Rafah                     | 35 | 77.4       | 12.3 |                |         |
| <b>Qualification</b>      |    |            |      |                |         |
| Diploma 2 years           | 48 | 73.8       | 14.4 | 1.029          | 0.382   |
| Diploma 3 years           | 30 | 75.7       | 17.7 |                |         |
| BSN                       | 60 | 77.2       | 12.1 |                |         |
| Master                    | 12 | 70.4       | 13.4 |                |         |

\* Significant  $P \leq 0.05$

**Table S6.** Correlation between knowledge and attitudes

| Domain    | Attitude |         |
|-----------|----------|---------|
|           | r        | P-value |
| Knowledge | 0.236    | 0.004*  |

\* Significant  $P \leq 0.05$

**Table S7.** Effect of knowledge on attitude (Simple linear regressions)

|              | R     | R <sup>2</sup> | Adjusted R <sup>2</sup> | SE  | F     | P-value |
|--------------|-------|----------------|-------------------------|-----|-------|---------|
| <b>Model</b> | 0.236 | 0.056          | .049                    | 2.1 | 8.714 | 0.004*  |

\* Significant  $P \leq 0.05$

**Table S8.** Simple linear regression model and equation to test effect of knowledge on attitude among participants

|                  | B      | SE    | Beta  | t      | P-value | 95% CI |       |
|------------------|--------|-------|-------|--------|---------|--------|-------|
|                  |        |       |       |        |         | Lower  | Upper |
| <b>Constant</b>  | 25.204 | 2.100 |       | 12.005 | < .001  | 21.05  | 29.36 |
| <b>Knowledge</b> | 0.217  | 0.074 | 0.236 | 2.952  | 0.004   | 0.07   | 0.36  |

**Table S9.** Exploratory multivariable linear regression model for knowledge score

Higher scores indicate higher knowledge in the reverse-oriented adjusted analysis. Reference categories: age 31–40 years; qualification Bachelor's degree; experience 11–20 years; clinic address Gaza; prior training No.

| Predictor                                           | $\beta$ (95% CI)   | P value       |
|-----------------------------------------------------|--------------------|---------------|
| Age: 30 years and below vs 31–40 years              | -3.1 (-9.4 to 3.1) | 0.322         |
| Age: 41 years and above vs 31–40 years              | -2.8 (-9.9 to 4.2) | 0.427         |
| Qualification: Diploma 2 years vs Bachelor's degree | -0.2 (-5.5 to 5.2) | 0.954         |
| Qualification: Diploma 3 years vs Bachelor's degree | 1.7 (-6.6 to 10.0) | 0.684         |
| Qualification: Master's degree vs Bachelor's degree | -1.3 (-9.7 to 7.0) | 0.751         |
| Experience: 10 years and less vs 11–20 years        | -1.4 (-7.4 to 4.7) | 0.653         |
| Experience: 21 years and more vs 11–20 years        | -0.4 (-8.5 to 7.6) | 0.919         |
| Clinic address: Khan Younis vs Gaza                 | 2.8 (-4.3 to 9.9)  | 0.436         |
| Clinic address: Midzone vs Gaza                     | 6.1 (-1.5 to 13.6) | 0.116         |
| Clinic address: North Gaza vs Gaza                  | 5.7 (-1.8 to 13.1) | 0.137         |
| Clinic address: Rafah vs Gaza                       | 9.3 (2.7 to 16.0)  | <b>0.007*</b> |
| Prior training: Yes vs No                           | 1.1 (-5.7 to 7.9)  | 0.751         |

Note: Model  $R^2 = 0.072$ ; adjusted  $R^2 = -0.010$ ; overall  $p = 0.437$ .

**Table S10.** Exploratory multivariable linear regression model for attitude score

Reference categories: age 31–40 years; qualification Bachelor's degree; experience 11–20 years; clinic address Gaza; prior training No.

| Predictor                                           | $\beta$ (95% CI)    | P value       |
|-----------------------------------------------------|---------------------|---------------|
| Age: 30 years and below vs 31–40 years              | 1.5 (-6.4 to 9.4)   | 0.706         |
| Age: 41 years and above vs 31–40 years              | 4.5 (-1.8 to 10.8)  | 0.158         |
| Qualification: Diploma 2 years vs Bachelor's degree | -1.9 (-7.1 to 3.4)  | 0.479         |
| Qualification: Diploma 3 years vs Bachelor's degree | 2.1 (-4.8 to 8.9)   | 0.549         |
| Qualification: Master's degree vs Bachelor's degree | -6.5 (-15.8 to 2.8) | 0.172         |
| Experience: 10 years and less vs 11–20 years        | 8.4 (1.8 to 15.1)   | <b>0.014*</b> |

|                                                |                       |               |
|------------------------------------------------|-----------------------|---------------|
| Experience: 21 years and more vs 11–20 years   | -3.3 (-10.8 to 4.2)   | 0.389         |
| Clinic address: Khan Younis vs Gaza            | 2.6 (-2.9 to 8.1)     | 0.355         |
| Clinic address: Midzone vs Gaza                | -8.9 (-19.0 to 1.3)   | 0.087         |
| Clinic address: North Gaza vs Gaza             | -11.4 (-18.8 to -3.9) | <b>0.003*</b> |
| Clinic address: Rafah vs Gaza                  | 0.4 (-6.0 to 6.7)     | 0.911         |
| Prior training: Yes vs No                      | 3.8 (-0.7 to 8.3)     | 0.098         |
| Adjusted knowledge score, per 1-point increase | 0.28 (0.09 to 0.47)   | <b>0.004*</b> |

*Note: Model  $R^2 = 0.246$ ; adjusted  $R^2 = 0.174$ ; overall  $p < 0.001$ .*

**Table S11.** Positioning of the present study in relation to selected published studies on healthcare professionals' knowledge, attitudes, or information use regarding medication use during breastfeeding

| Study                            | Country/setting                | Participant group                      | Main focus                                                                                        | What is distinctive about the present study                                                                                                                                                                                                                                                |
|----------------------------------|--------------------------------|----------------------------------------|---------------------------------------------------------------------------------------------------|--------------------------------------------------------------------------------------------------------------------------------------------------------------------------------------------------------------------------------------------------------------------------------------------|
| Hussainy and Dermele (2011) [26] | Review of published literature | Health professionals and women         | Knowledge, attitudes and practices regarding medication use in breastfeeding                      | The present study adds primary data from governmental primary care nurses in Gaza and examines not only knowledge and attitudes, but also perceived access to medicines-information resources and adequacy of counselling.                                                                 |
| De Ponti et al. (2015) [25]      | Australia                      | Community pharmacists                  | Perspectives on medication use and safety during breastfeeding                                    | The present study focuses on nurses rather than pharmacists, is situated in governmental PHCCs, and examines frontline breastfeeding support in a conflict-affected and resource-constrained primary care setting.                                                                         |
| Al-Sawalha NA et al. (2017) [32] | Jordan                         | Healthcare providers, including nurses | Knowledge and attitudes regarding medication use in breastfeeding women                           | The present study focuses specifically on governmental primary care nurses in Gaza and extends the analysis by emphasising medicines-information access, perceived counselling adequacy and systems-level implications for breastfeeding support.                                          |
| Present study                    | Gaza, governmental PHCCs       | Female primary care nurses             | Knowledge, attitudes, access to medicines information, and implications for breastfeeding support | Distinctive features include focus on governmental primary care nurses, a conflict-affected setting, explicit attention to access to medicines-information resources, and interpretation of the findings as a service-capacity gap rather than a simple deficit in professional attitudes. |
